# Supplementary material for: Understanding the ability of low-cost MOx sensors to quantifyambient VOCs
Source: Copernicus journal article supplement (doi:10.5194/amt-2018-304), 2018-09-26

Supplemental Material

Figure S1 – Correlation plot for reference gases

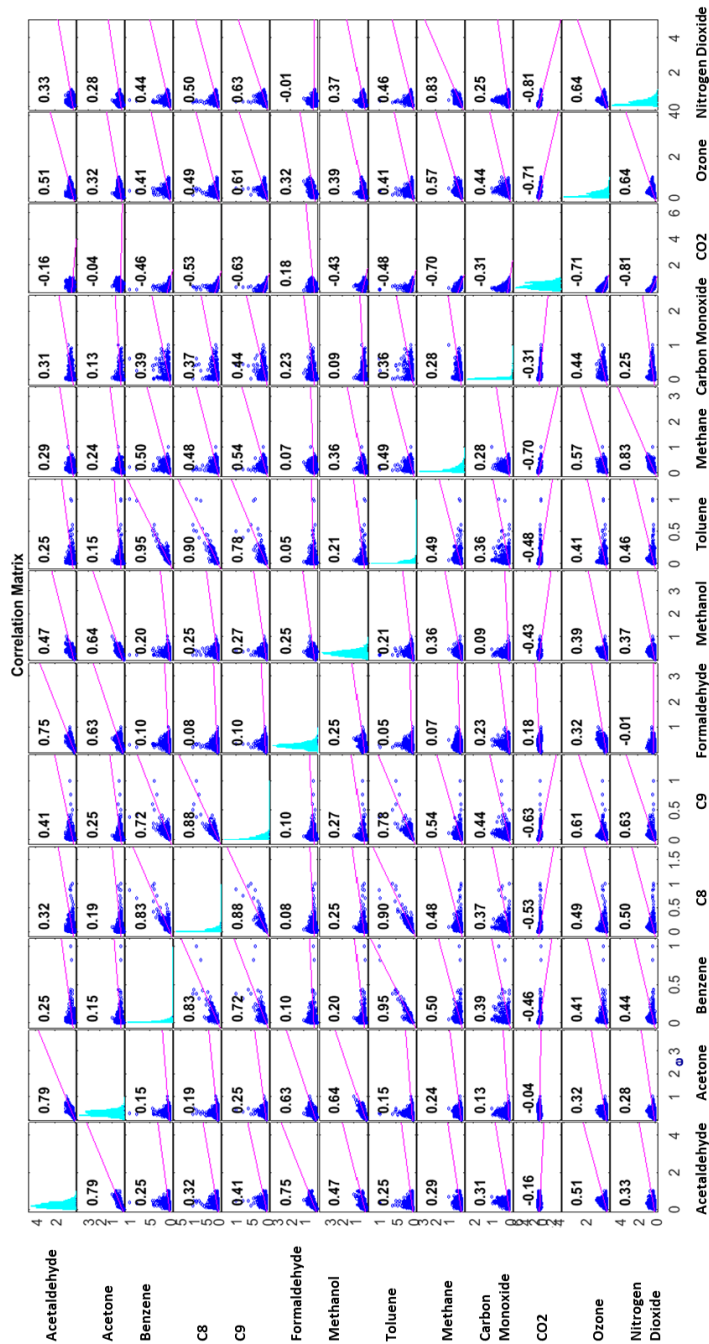

**Figures S2 - Regression model residuals (from Section 3.1)**

a (top left four panels) – models for benzene

b (top right four panels) – models for summed aromatics

5 c (bottom left four panels) – models for summed VOCs

d (bottom right four panels) – models for methane

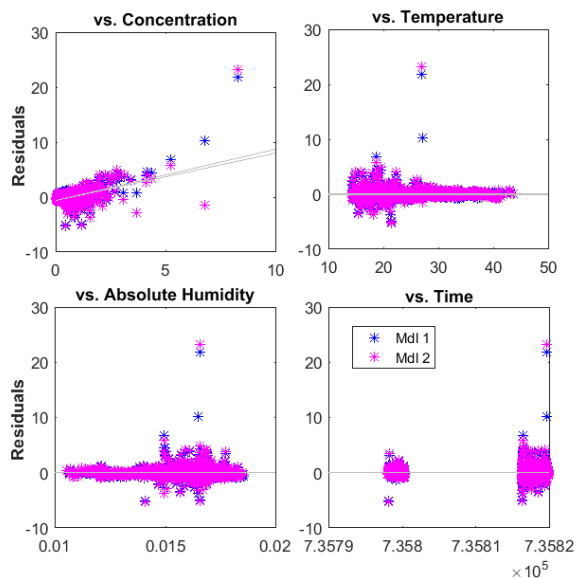

a.

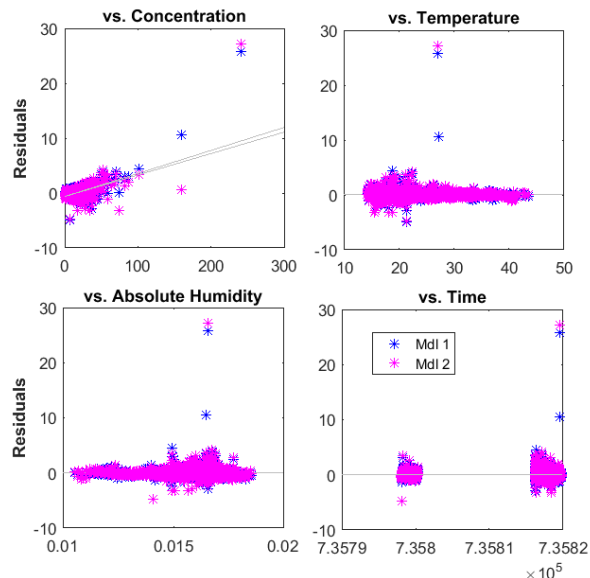

b.

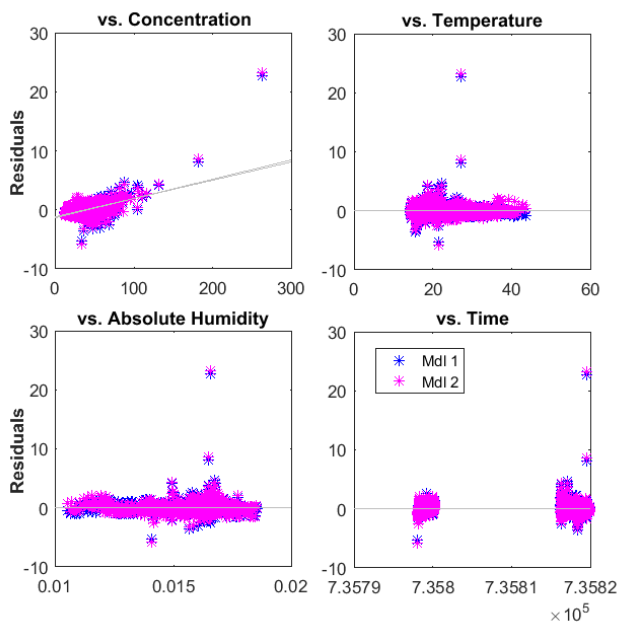

c.

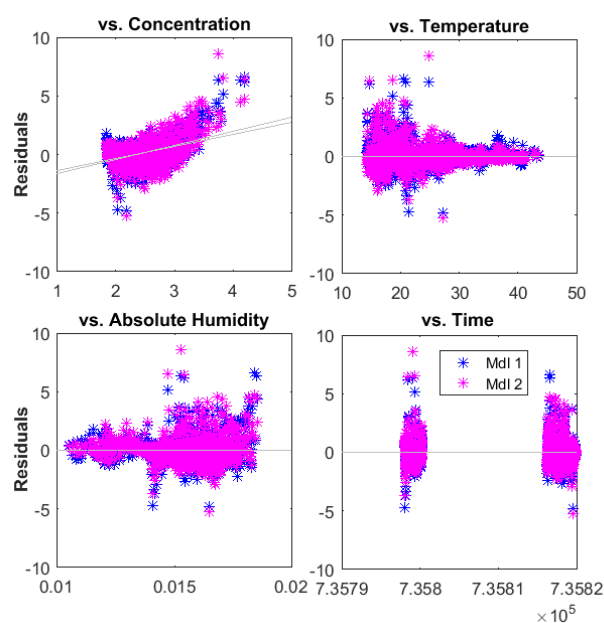

d.

**Figures S3 – Additional residuals for models vs. target and non-target VOCs (Section 3.1.4)**

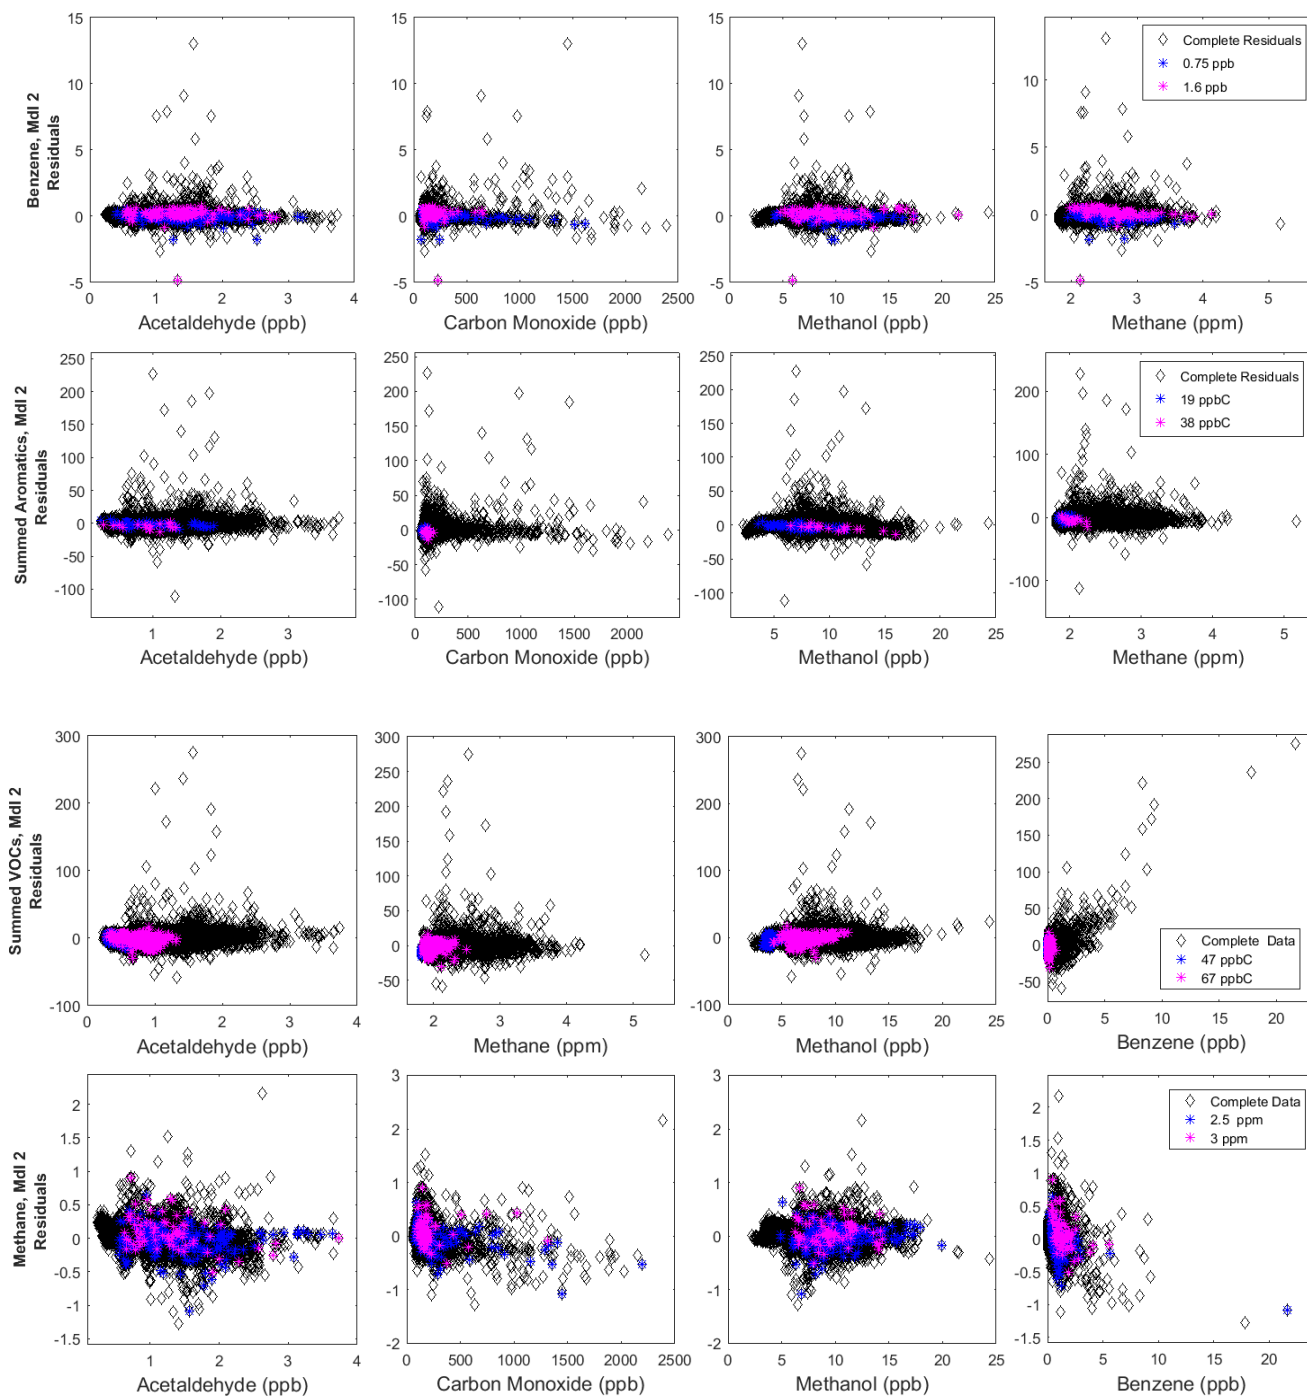

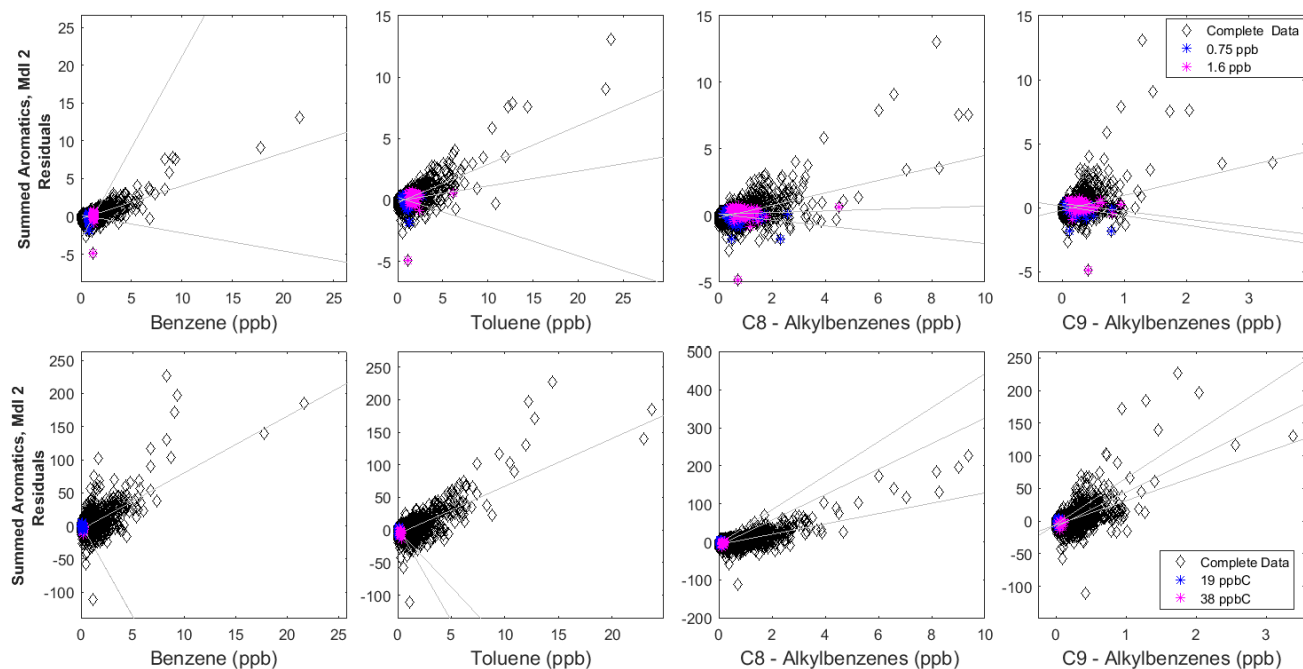

*Figures S4 – ANOVA results illustrating the percentage of variance in the sensor signal explained by various predictors for complete data and subsets of data (top – Figaro 2600, bottom – Figaro 2602) (Section 3.2)*

5 (White indicates that a predictor was not included in a run, and the VOC species subsets are defined in Figure S5)

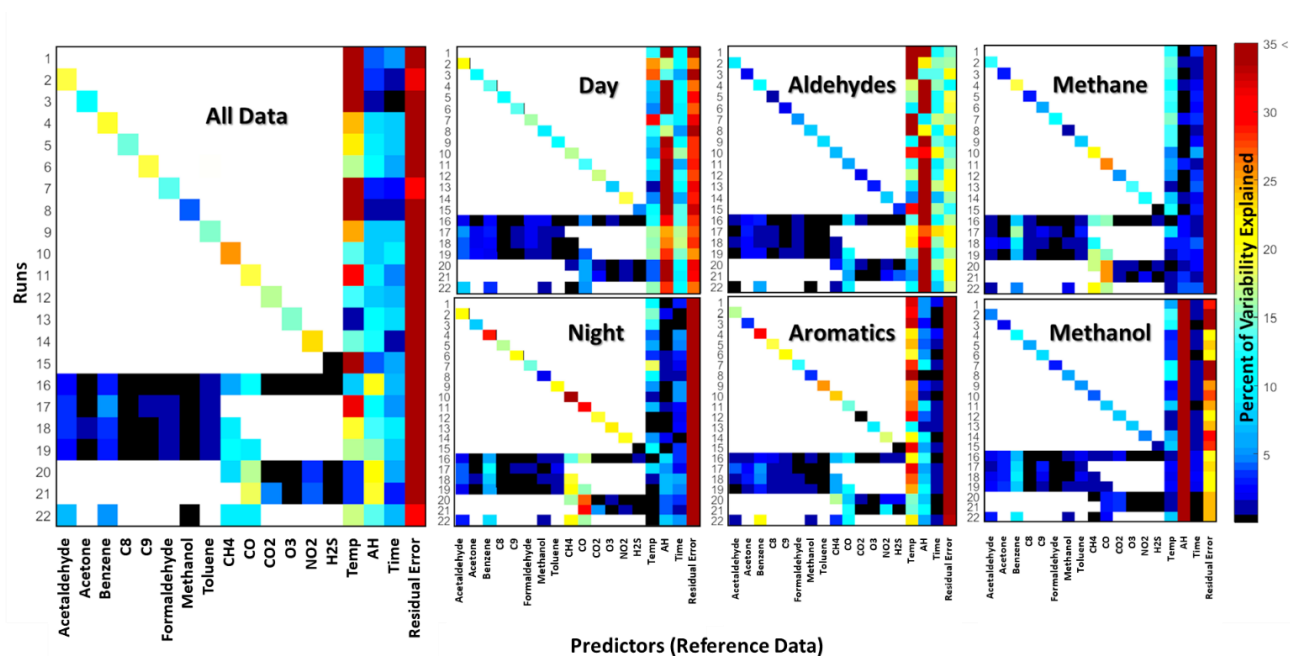

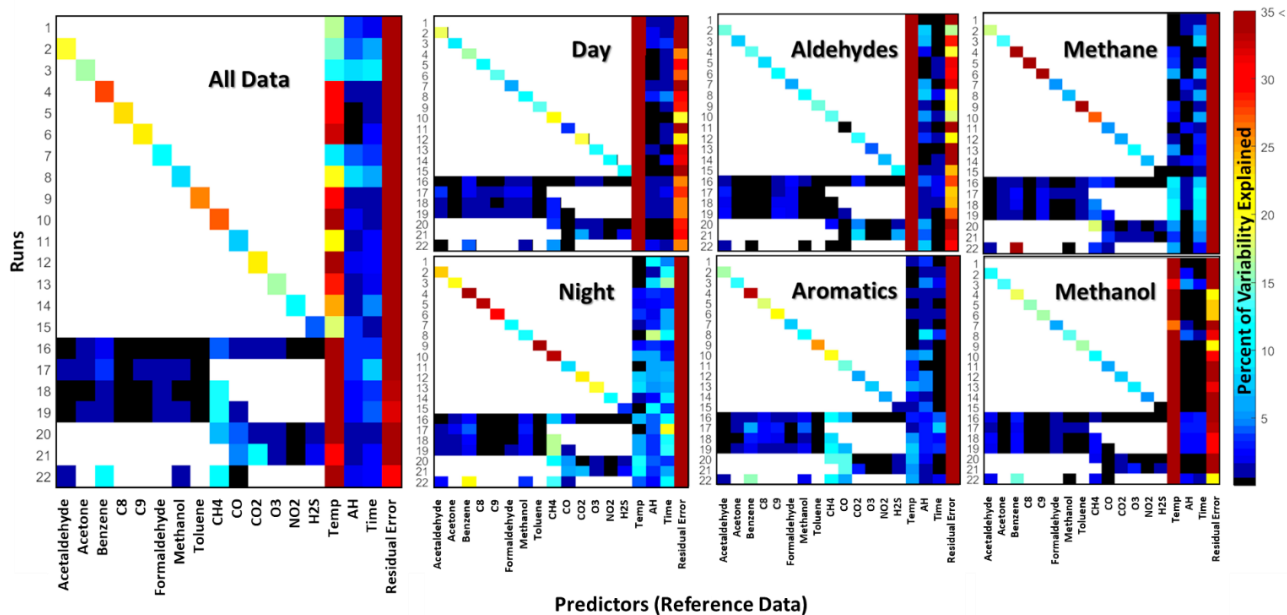

S5 – Illustration of selected periods of different relative composition (Section 3.2)

5

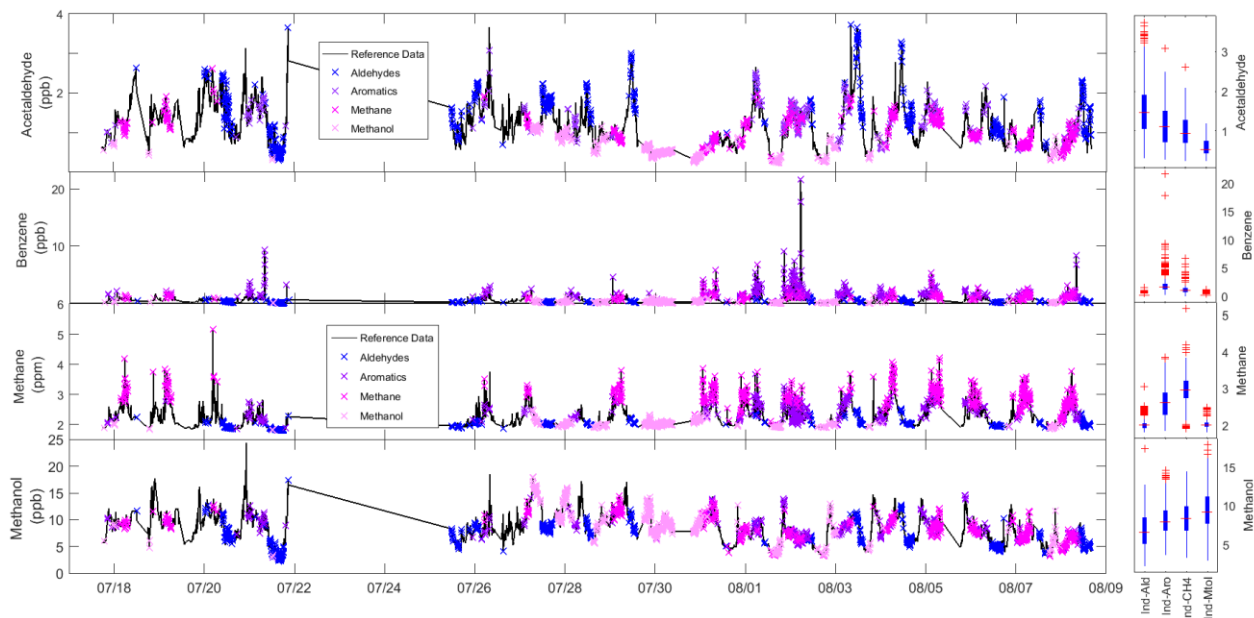

**Figure S6: Sensor signal vs. temperature and pollutant concentrations (Section 3.2)**

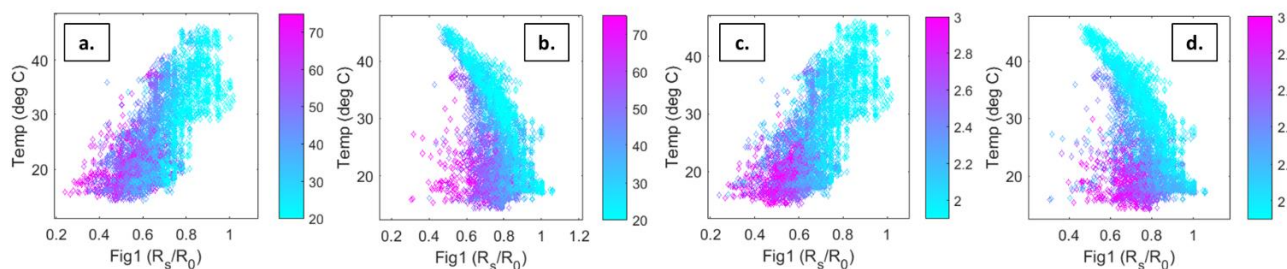

**Figures S7: Regression analysis results, excluding VOC sensor signals (Section 3.2)**

(training data before 7/20 & after 8/5, remaining data is testing)

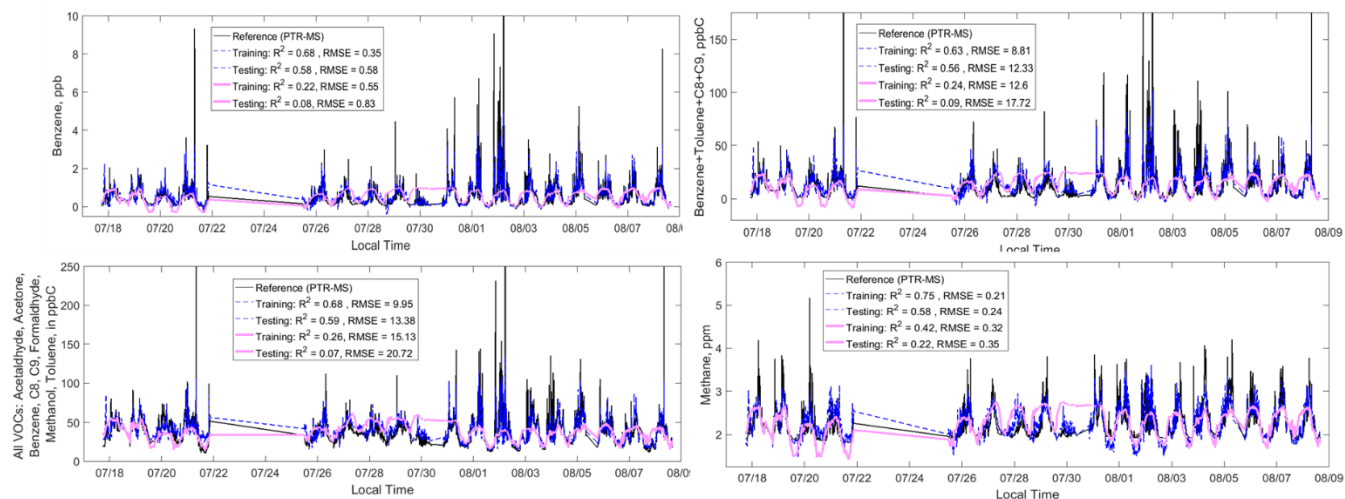

5

**Figures S8: Bootstrap analysis for sensor set in secondary U-Pod (Section 3.2)**

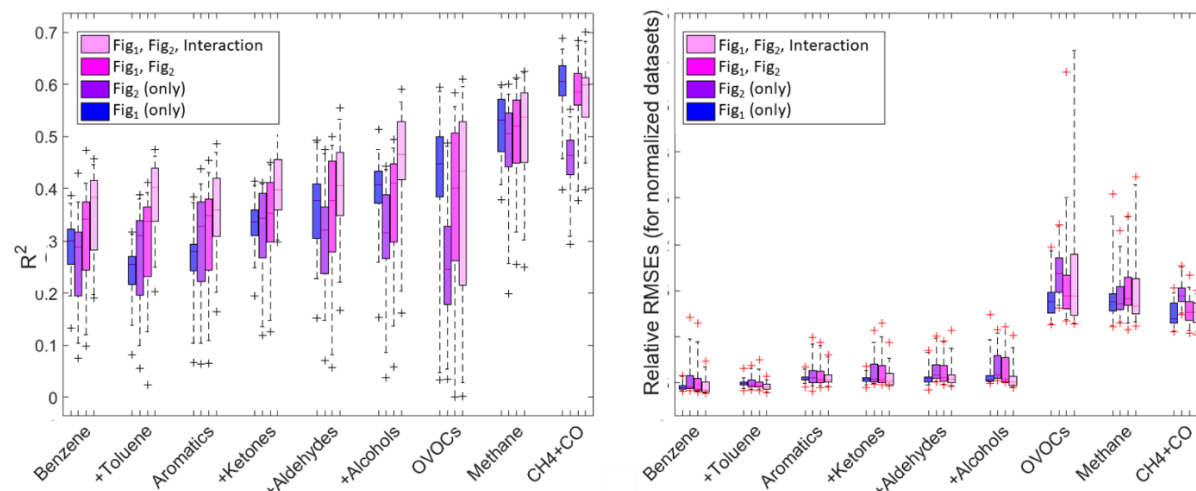

6

**Figures S9: Regression analysis results for sensor set in secondary U-Pod**

(training data before 7/20 & after 8/5, remaining data is testing)

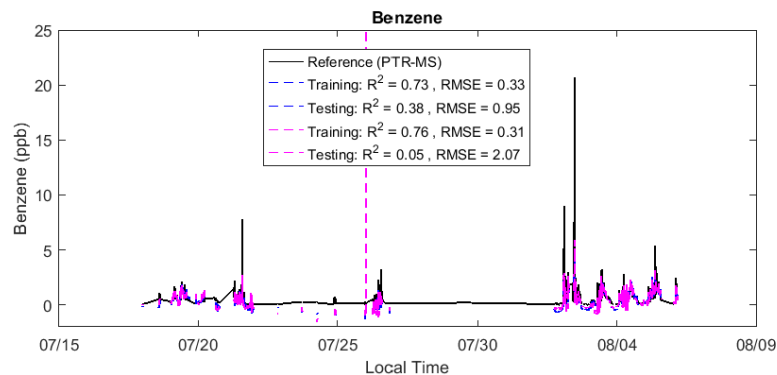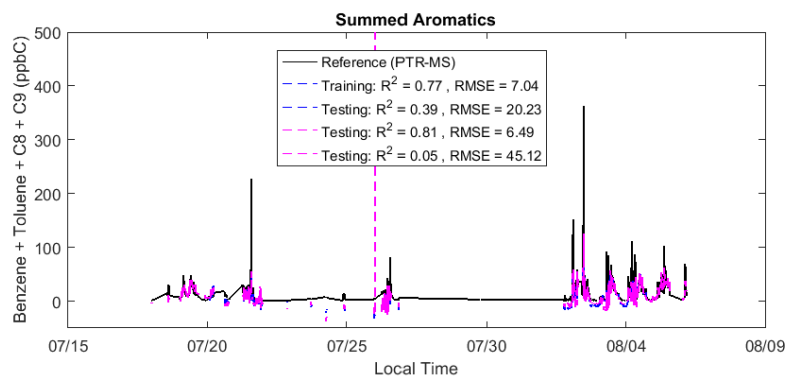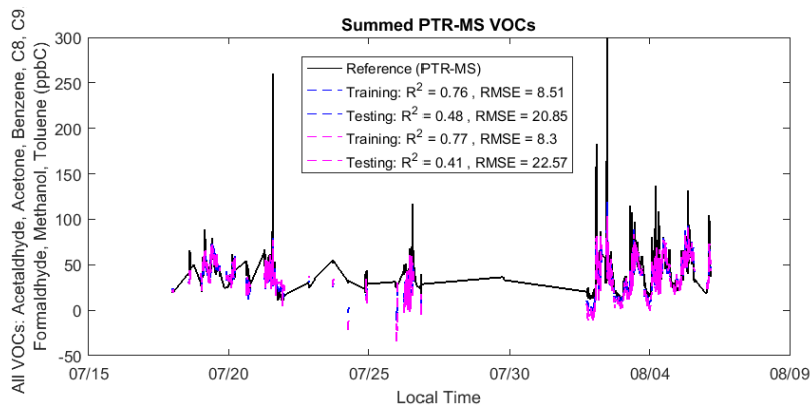

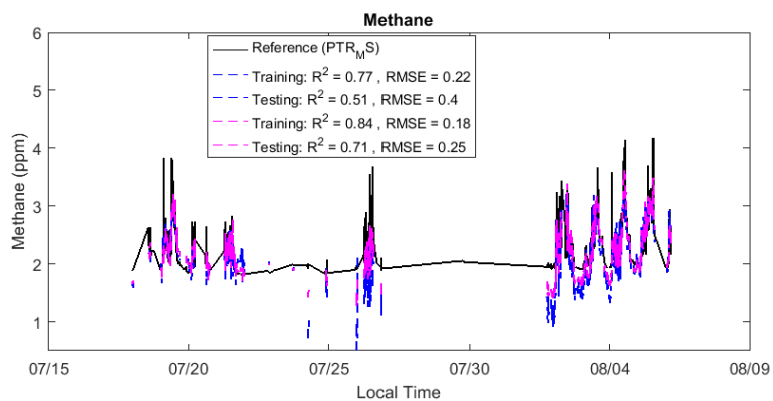

**Figures S10: Complete sensor ratio plots (Section 3.3)**

■  $1.75 < r$   
■  $1.15 < r < 1.75$   
■  $0.65 < r < 0.95$   
■  $0.40 < r < 0.65$   
■  $0.00 < r < 0.40$

Fig1/Fig2 Ratio  
(R/R0, w/  
baseline removed)

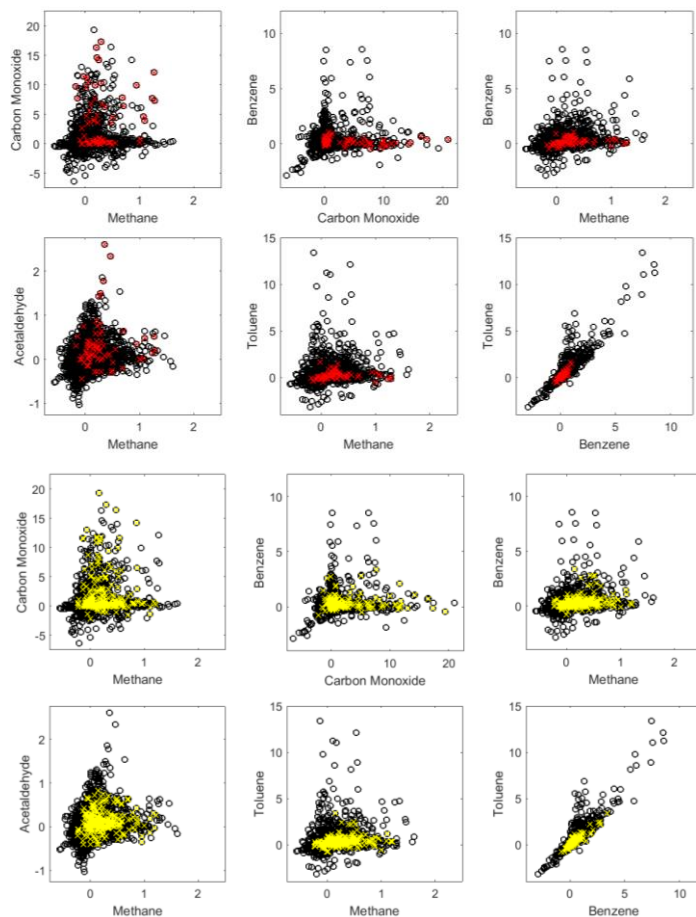



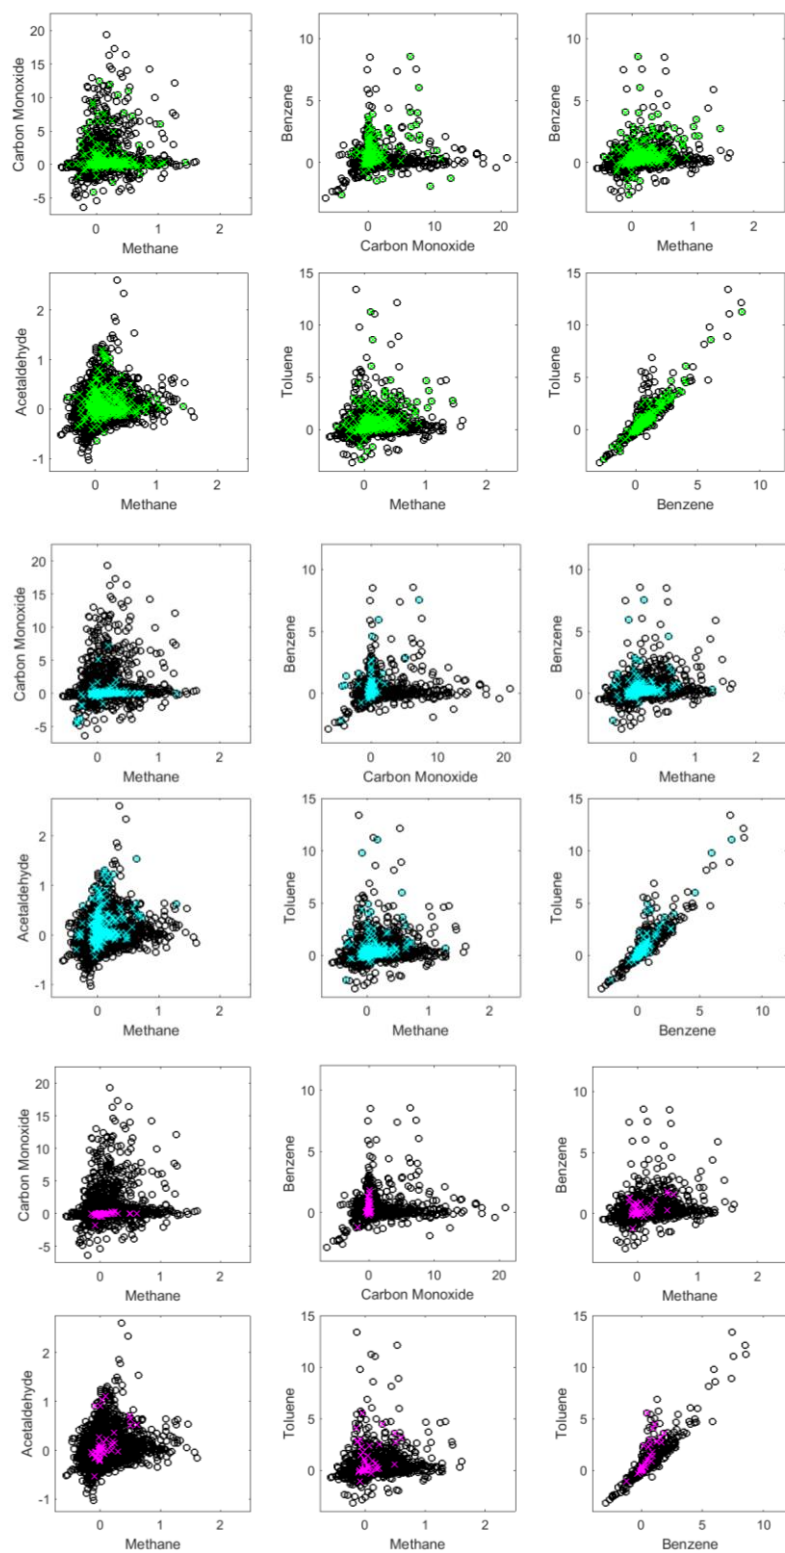

Supplement: Supplementary file 1 [file amt-2018-304-supplement.pdf]
